# Supplementary material
Source: PubMed Central journal article supplement (PMC4969122)
Supplement: NIHMS760232-supplement-2.pdf [file NIHMS760232-supplement-2.pdf]

**Table S1. Baseline data from the entire eligible cohort and following propensity score matching for all variables used in the propensity score.**

|                               | <i>Non-Matched</i>              |                                    |                             |                     |                     | <i>Propensity Matched (0.1 Caliper)</i> |                                         |                            |                     |
|-------------------------------|---------------------------------|------------------------------------|-----------------------------|---------------------|---------------------|-----------------------------------------|-----------------------------------------|----------------------------|---------------------|
|                               | <b>Total<br/>(N =<br/>3122)</b> | <b>No<br/>Aspirin<br/>(N=1998)</b> | <b>Aspirin<br/>(N=1124)</b> | <i>p-<br/>value</i> | <i>Std<br/>diff</i> | <b>Total<br/>(N=1962)</b>               | <b>No<br/>Aspirin<br/>(N<br/>=981%)</b> | <b>Aspirin<br/>(N=981)</b> | <i>Std<br/>diff</i> |
| Age (years)                   | 50.8 ±<br>9.3                   | 49.7 ± 9.1                         | 52.9 ± 9.3                  | <0.001              | -<br>34.8%          | 52.2 ± 9.2                              | 52.2 ±<br>9.4                           | 52.2 ±<br>9.2              | -<br>0.2%           |
| Female                        | 1242<br>(39.8%)                 | 812<br>(40.6%)                     | 430<br>(38.3%)              | 0.19                | 4.9%                | 769<br>(39.2%)                          | 385<br>(39.3%)                          | 384<br>(39.1%)             | 0.2%                |
| Race                          |                                 |                                    |                             |                     |                     |                                         |                                         |                            |                     |
| White                         | 2333<br>(74.7%)                 | 1441<br>(72.1%)                    | 892<br>(79.4%)              |                     | -<br>16.9%          | 1505<br>(76.7%)                         | 748<br>(76.3%)                          | 757<br>(77.2%)             | -<br>2.2%           |
| Black                         | 576<br>(18.5%)                  | 404<br>(20.2%)                     | 172<br>(15.3%)              | <0.001              | 12.9%               | 338<br>(17.2%)                          | 173<br>(17.6%)                          | 165<br>(16.8%)             | 2.2%                |
| Other                         | 213<br>(6.8%)                   | 153<br>(7.7%)                      | 60 (5.3%)                   |                     | 9.4%                | 119<br>(6.1%)                           | 60<br>(6.1%)                            | 59<br>(6.0%)               | 0.4%                |
| Country                       |                                 |                                    |                             |                     |                     |                                         |                                         |                            |                     |
| United States                 | 2204<br>(70.6%)                 | 1374<br>(68.8%)                    | 830<br>(73.8%)              | <0.001              | -<br>11.2%          | 1413<br>(72.0%)                         | 701<br>(71.5%)                          | 712<br>(72.6%)             | -<br>2.5%           |
| Canada                        | 405<br>(13.0%)                  | 304<br>(15.2%)                     | 101<br>(9.0%)               |                     | 19.2%               | 186<br>(9.5%)                           | 90<br>(9.2%)                            | 96<br>(9.8%)               | -<br>2.1%           |
| Brazil                        | 513<br>(16.4%)                  | 320<br>(16.0%)                     | 193<br>(17.2%)              |                     | -3.1%               | 363<br>(18.5%)                          | 190<br>(19.4%)                          | 173<br>(17.6%)             | 4.5%                |
| Treatment Group<br>Assignment |                                 |                                    |                             |                     |                     |                                         |                                         |                            |                     |
| Low dose vitamin              | 1560<br>(50.0%)                 | 979<br>(49.0%)                     | 581<br>(51.7%)              | 0.2                 | -5.4%               | 1012<br>(51.6%)                         | 511<br>(52.1%)                          | 501<br>(51.1%)             | 2.0%                |
| High dose vitamin             | 1562<br>(50.0%)                 | 1019<br>(51.0%)                    | 543<br>(48.3%)              |                     | 5.4%                | 950<br>(48.4%)                          | 470<br>(47.9%)                          | 480<br>(48.9%)             | -<br>2.0%           |
| Diabetes                      | 1101<br>(35.3%)                 | 578<br>(28.9%)                     | 523<br>(46.5%)              | <0.001              | -<br>36.9%          | 820<br>(41.8%)                          | 407<br>(41.5%)                          | 413<br>(42.1%)             | -<br>1.2%           |
| Diabetes Medication<br>Use    |                                 |                                    |                             |                     |                     |                                         |                                         |                            |                     |

*Dad et al, AJKD, "Aspirin Use and Incident Cardiovascular Disease, Kidney Failure, and Death in Stable Kidney Transplant Recipients: A Post Hoc Analysis of the Folic Acid for Vascular Outcome Reduction in Transplantation (FAVORIT) Trial"*

|                                 |                 |                 |                 |        |            |                 |                |                |           |
|---------------------------------|-----------------|-----------------|-----------------|--------|------------|-----------------|----------------|----------------|-----------|
| Thiazolidinedione               | 96<br>(3.1%)    | 49 (2.5%)       | 47 (4.2%)       | 0.01   | -9.7%      | 74 (3.8%)       | 36<br>(3.7%)   | 38<br>(3.9%)   | -<br>1.1% |
| Acarbose                        | 4 (0.1%)        | 2 (0.1%)        | 2 (0.2%)        | 0.6    | -2.1%      | 3 (0.2%)        | 1 (0.1%)       | 2 (0.2%)       | -<br>2.6% |
| Metformin                       | 53<br>(1.7%)    | 31 (1.6%)       | 22 (2.0%)       | 0.4    | -3.1%      | 40 (2.0%)       | 21<br>(2.1%)   | 19<br>(1.9%)   | 1.4%      |
| Insulin                         | 560<br>(17.9%)  | 282<br>(14.1%)  | 278<br>(24.7%)  | <0.001 | -<br>27.1% | 416<br>(21.2%)  | 211<br>(21.5%) | 205<br>(20.9%) | 1.5%      |
| Sulfonylurea                    | 216<br>(6.9%)   | 132<br>(6.6%)   | 84 (7.5%)       | 0.4    | -3.4%      | 147<br>(7.5%)   | 69<br>(7.0%)   | 78<br>(8.0%)   | -<br>3.5% |
| Hypertension                    | 2845<br>(91.1%) | 1793<br>(89.7%) | 1052<br>(93.6%) | <0.001 | -<br>14.0% | 1826<br>(93.1%) | 914<br>(93.2%) | 912<br>(93.0%) | 0.8%      |
| Antihypertensive Medication Use | 2600<br>(83.3%) | 1635<br>(81.8%) | 965<br>(85.9%)  | 0.004  | -<br>10.9% | 1664<br>(84.8%) | 829<br>(84.5%) | 835<br>(85.1%) | -<br>1.7% |
| ACE inhibitor and/or ARB        | 1349<br>(43.2%) | 832<br>(41.6%)  | 517<br>(46.0%)  | 0.02   | -8.8%      | 893<br>(45.5%)  | 447<br>(45.6%) | 446<br>(45.5%) | 0.2%      |
| ACE inhibitor                   | 989<br>(31.7%)  | 605<br>(30.3%)  | 384<br>(34.2%)  | 0.03   | -8.3%      | 663<br>(33.8%)  | 337<br>(34.4%) | 326<br>(33.2%) | 2.4%      |
| Angiotensin Receptor Blocker    | 408<br>(13.1%)  | 257<br>(12.9%)  | 151<br>(13.4%)  | 0.65   | -1.7%      | 256<br>(13.1%)  | 122<br>(12.4%) | 134<br>(13.7%) | -<br>3.6% |
| Beta Blocker                    | 1650<br>(52.9%) | 1006<br>(50.4%) | 644<br>(57.3%)  | <0.001 | -<br>14.0% | 1105<br>(56.3%) | 558<br>(56.9%) | 547<br>(55.8%) | 2.3%      |
| Loop Diuretics                  | 861<br>(27.6%)  | 502<br>(25.1%)  | 359<br>(31.9%)  | <0.001 | -<br>15.1% | 590<br>(30.1%)  | 295<br>(30.1%) | 295<br>(30.1%) | 0.0%      |
| Other Diuretics                 | 311<br>(10.0%)  | 205<br>(10.3%)  | 106<br>(9.4%)   | 0.5    | 2.8%       | 187<br>(9.5%)   | 93<br>(9.5%)   | 94<br>(9.6%)   | -<br>0.3% |
| Smoking status                  |                 |                 |                 |        |            |                 |                |                |           |
| Never                           | 1629<br>(52.2%) | 1056<br>(52.9%) | 573<br>(51.0%)  | 0.2    | 3.8%       | 1002<br>(51.1%) | 499<br>(50.9%) | 503<br>(51.3%) | -<br>0.8% |
| Current                         | 351<br>(11.2%)  | 234<br>(11.7%)  | 117<br>(10.4%)  |        | 4.2%       | 201<br>(10.2%)  | 98<br>(10.0%)  | 103<br>(10.5%) | -<br>1.7% |
| Ever                            | 1142<br>(36.6%) | 708<br>(35.4%)  | 434<br>(38.6%)  |        | -6.6%      | 759<br>(38.7%)  | 384<br>(39.1%) | 375<br>(38.2%) | 1.9%      |
| Living donor                    | 1352<br>(43.3%) | 871<br>(43.6%)  | 481<br>(42.8%)  | 0.7    | 1.6%       | 862<br>(43.9%)  | 438<br>(44.7%) | 424<br>(43.2%) | 2.9%      |
| Immunosuppression               |                 |                 |                 |        |            |                 |                |                |           |

*Dad et al, AJKD, "Aspirin Use and Incident Cardiovascular Disease, Kidney Failure, and Death in Stable Kidney Transplant Recipients: A Post Hoc Analysis of the Folic Acid for Vascular Outcome Reduction in Transplantation (FAVORIT) Trial"*

|                                 |                       |                    |                    |        |            |                    |                       |                       |           |
|---------------------------------|-----------------------|--------------------|--------------------|--------|------------|--------------------|-----------------------|-----------------------|-----------|
| Medication                      |                       |                    |                    |        |            |                    |                       |                       |           |
| CNI-based regimen               | 2769<br>(88.7%)       | 1757<br>(87.9%)    | 1012<br>(90.0%)    | 0.08   | -6.7%      | 1761<br>(89.8%)    | 885<br>(90.2%)        | 876<br>(89.3%)        | 3.0%      |
| Cyclosporine                    | 1603<br>(51.4%)       | 1016<br>(50.9%)    | 587<br>(52.2%)     | 0.5    | -2.7%      | 1032<br>(52.6%)    | 526<br>(53.6%)        | 506<br>(51.6%)        | 4.1%      |
| Tacrolimus                      | 1173<br>(37.6%)       | 744<br>(37.2%)     | 429<br>(38.2%)     | 0.6    | -1.9%      | 735<br>(37.5%)     | 361<br>(36.8%)        | 374<br>(38.1%)        | -<br>2.7% |
| Sirolimus                       | 262<br>(8.4%)         | 154<br>(7.7%)      | 108<br>(9.6%)      | 0.07   | -6.8%      | 175<br>(8.9%)      | 89<br>(9.1%)          | 86<br>(8.8%)          | 1.1%      |
| Mycophenolate                   | 2018<br>(64.6%)       | 1276<br>(63.9%)    | 742<br>(66.0%)     | 0.2    | -4.5%      | 1295<br>(66.0%)    | 650<br>(66.3%)        | 645<br>(65.8%)        | 1.1%      |
| Azathioprine                    | 589<br>(18.9%)        | 397<br>(19.9%)     | 192<br>(17.1%)     | 0.06   | 7.2%       | 359<br>(18.3%)     | 181<br>(18.5%)        | 178<br>(18.1%)        | 0.8%      |
| Prednisone                      | 2853<br>(91.4%)       | 1833<br>(91.7%)    | 1020<br>(90.8%)    | 0.3    | 3.5%       | 1798<br>(91.6%)    | 904<br>(92.2%)        | 894<br>(91.1%)        | 3.7%      |
| Cholesterol Lowering Medication |                       |                    |                    |        |            |                    |                       |                       |           |
| Statin Use                      | 1546<br>(49.5%)       | 923<br>(46.2%)     | 623<br>(55.4%)     | <0.001 | -<br>18.5% | 1043<br>(53.2%)    | 524<br>(53.4%)        | 519<br>(52.9%)        | 1.0%      |
| Fibrate Use                     | 90<br>(2.9%)          | 53 (2.7%)          | 37 (3.3%)          | 0.3    | -3.8%      | 62 (3.2%)          | 31<br>(3.2%)          | 31<br>(3.2%)          | 0.0%      |
| Ezetimibe Use                   | 82<br>(2.6%)          | 50 (2.5%)          | 32 (2.9%)          | 0.6    | -2.1%      | 53 (2.7%)          | 24<br>(2.5%)          | 29<br>(3.0%)          | -<br>3.1% |
| Graft vintage (years)           | 4.1<br>(1.7 –<br>7.5) | 4.4<br>(1.9 – 8.2) | 3.3<br>(1.4 – 6.7) | <0.001 | 22.1%      | 3.6<br>(1.6 – 6.8) | 3.8<br>(1.7 –<br>6.6) | 3.5<br>(1.5 –<br>6.9) | -<br>1.6% |
| BMI (kg/m <sup>2</sup> )        | 29.1 ±<br>6.4         | 28.9 ± 6.4         | 29.3 ± 6.3         | 0.2    | -5.2%      | 29.1 ± 6.3         | 29.1 ±<br>6.2         | 29.1 ±<br>6.3         | -<br>1.0% |
| Weight (kg)                     | 84.1 ±<br>20.3        | 83.6 ±<br>20.6     | 85.0 ±<br>19.9     | 0.07   | -6.8%      | 84.3 ±<br>19.9     | 84.2 ±<br>20.2        | 84.3 ±<br>19.6        | -<br>0.5% |
| Systolic BP (mmHg)              | 135.5 ±<br>19.4       | 135.3 ±<br>19.0    | 136.0 ±<br>20.0    | 0.3    | -3.6%      | 136.0 ±<br>19.5    | 135.9 ±<br>19.1       | 136.2 ±<br>20.0       | -<br>1.4% |
| Diastolic BP (mmHg)             | 79.3 ±<br>11.9        | 80.1 ±<br>11.8     | 77.8 ±<br>11.9     | <0.001 | 19.0%      | 78.7 ±<br>12.0     | 78.7 ±<br>12.1        | 78.7 ±<br>11.9        | 0.1%      |
| Other Medications               |                       |                    |                    |        |            |                    |                       |                       |           |

*Dad et al, AJKD, "Aspirin Use and Incident Cardiovascular Disease, Kidney Failure, and Death in Stable Kidney Transplant Recipients: A Post Hoc Analysis of the Folic Acid for Vascular Outcome Reduction in Transplantation (FAVORIT) Trial"*

|                                           |                      |                       |                      |        |       |                      |                      |                      |           |
|-------------------------------------------|----------------------|-----------------------|----------------------|--------|-------|----------------------|----------------------|----------------------|-----------|
| Contraceptives                            | 30<br>(1.0%)         | 17 (0.9%)             | 13 (1.2%)            | 0.4    | -3.1% | 19 (1.0%)            | 10<br>(1.0%)         | 9 (0.9%)             | 1.0%      |
| Estrogen Replacement                      | 111<br>(3.6%)        | 80 (4.0%)             | 31 (2.8%)            | 0.07   | 6.9%  | 56 (2.9%)            | 28<br>(2.9%)         | 28<br>(2.9%)         | 0.0%      |
| Levothyroxine                             | 5 (0.2%)             | 2 (0.1%)              | 3 (0.3%)             | 0.3    | -3.9% | 4 (0.2%)             | 2 (0.2%)             | 2 (0.2%)             | 0.0%      |
| Raloxifene                                | 10<br>(0.3%)         | 5 (0.3%)              | 5 (0.4%)             | 0.4    | -3.3% | 6 (0.3%)             | 3 (0.3%)             | 3 (0.3%)             | 0.0%      |
| Tamoxifen                                 | 6 (0.2%)             | 1 (0.1%)              | 5 (0.4%)             | 0.02   | -8.0% | 1 (0.1%)             | 1 (0.1%)             | 0 (0.0%)             | 4.5%      |
| Probucol                                  | 4 (0.1%)             | 3 (0.2%)              | 1 (0.1%)             | 0.7    | 1.8%  | 1 (0.1%)             | 0 (0.0%)             | 1 (0.1%)             | -<br>4.5% |
| Serum Creatinine (mg/dL)                  | 1.7 ± 0.6            | 1.7 ± 0.6             | 1.6 ± 0.5            | 0.002  | 11.7% | 1.6 ± 0.5            | 1.6 ± 0.5            | 1.6 ± 0.5            | 1.4%      |
| eGFR CKD-EPI (ml/min/1.73m <sup>2</sup> ) | 49.6 ± 18.0          | 49.2 ± 17.9           | 50.3 ± 18.1          | 0.1    | -5.8% | 50.0 ± 18.0          | 49.8 ± 17.8          | 50.3 ± 18.2          | -<br>3.0% |
| eGFR categories                           |                      |                       |                      |        |       |                      |                      |                      |           |
| ≥90                                       | 97<br>(3.1%)         | 62 (3.1%)             | 35 (3.1%)            | 0.6    | -0.1% | 69 (3.5%)            | 36<br>(3.7%)         | 33<br>(3.4%)         | 1.7%      |
| 60-90                                     | 661<br>(21.2%)       | 411<br>(20.6%)        | 250<br>(22.2%)       |        | -4.1% | 411<br>(21.0%)       | 192<br>(19.6%)       | 219<br>(22.3%)       | -<br>6.8% |
| 45-60                                     | 967<br>(31.0%)       | 613<br>(30.7%)        | 354<br>(31.5%)       |        | -1.8% | 632<br>(32.2%)       | 327<br>(33.3%)       | 305<br>(31.1%)       | 4.8%      |
| 30-45                                     | 1024<br>(32.8%)      | 662<br>(33.1%)        | 362<br>(32.2%)       |        | 2.0%  | 631<br>(32.2%)       | 316<br>(32.2%)       | 315<br>(32.1%)       | 0.2%      |
| <30                                       | 373<br>(12.0%)       | 250<br>(12.5%)        | 123<br>(10.9%)       |        | 4.9%  | 219<br>(11.2%)       | 110<br>(11.2%)       | 109<br>(11.1%)       | 0.3%      |
| ACR (mg/g)                                | 24.7<br>(8.4 – 95.6) | 27.7<br>(8.9 – 113.8) | 19.7<br>(7.8 – 64.3) | 0.01   | 9.9%  | 22.1<br>(7.8 – 78.5) | 23.5<br>(7.7 – 82.7) | 21.2<br>(7.9 – 69.4) | 6.1%      |
| ACR categories                            |                      |                       |                      |        |       |                      |                      |                      |           |
| <10                                       | 915<br>(29.3%)       | 559<br>(28.0%)        | 356<br>(31.7%)       | <0.001 | -8.1% | 607<br>(30.9%)       | 302<br>(30.8%)       | 305<br>(31.1%)       | -<br>0.7% |
| 10-29                                     | 804<br>(25.8%)       | 485<br>(24.3%)        | 319<br>(28.4%)       |        | -9.3% | 513<br>(26.2%)       | 245<br>(25.0%)       | 268<br>(27.3%)       | -<br>5.3% |
| 30-299                                    | 1017<br>(32.6%)      | 679<br>(34.0%)        | 338<br>(30.1%)       |        | 8.4%  | 632<br>(32.2%)       | 325<br>(33.1%)       | 307<br>(31.3%)       | 3.9%      |

*Dad et al, AJKD, "Aspirin Use and Incident Cardiovascular Disease, Kidney Failure, and Death in Stable Kidney Transplant Recipients: A Post Hoc Analysis of the Folic Acid for Vascular Outcome Reduction in Transplantation (FAVORIT) Trial"*

|                            |                    |                    |                    |        |         |                    |                    |                    |        |
|----------------------------|--------------------|--------------------|--------------------|--------|---------|--------------------|--------------------|--------------------|--------|
| >=300                      | 386<br>(12.4%)     | 275<br>(13.8%)     | 111<br>(9.9%)      |        | 12.1%   | 210<br>(10.7%)     | 109<br>(11.1%)     | 101<br>(10.3%)     | 2.6%   |
| Lipids                     |                    |                    |                    |        |         |                    |                    |                    |        |
| Total Cholesterol (mg/dL)  | 186.5 ± 43.1       | 189.0 ± 43.2       | 182.3 ± 42.7       | <0.001 | 15.6%   | 184.3 ± 41.8       | 184.8 ± 40.3       | 183.9 ± 43.2       | 2.1%   |
| HDL Cholesterol (mg/dL)    | 47.0 ± 14.2        | 47.2 ± 14.4        | 46.5 ± 13.9        | 0.2    | 5.2%    | 46.7 ± 14.0        | 46.6 ± 13.9        | 46.9 ± 14.1        | - 2.2% |
| LDL Cholesterol (mg/dL)    | 102.4 ± 33.5       | 104.0 ± 34.0       | 99.6 ± 32.2        | <0.001 | 13.3%   | 101.0 ± 33.1       | 101.2 ± 33.3       | 100.8 ± 32.9       | 1.2%   |
| Triglycerides (mg/dL)      | 163<br>(111 – 235) | 166<br>(113 – 236) | 159<br>(109 – 230) | 0.08   | 7.0%    | 163<br>(109 – 234) | 166<br>(110 – 235) | 160<br>(109 – 230) | 2.1%   |
| Other Labs                 |                    |                    |                    |        |         |                    |                    |                    |        |
| Glucose (mg/dL)            | 113.3 ± 53.0       | 111.1 ± 49.5       | 117.3 ± 58.5       | 0.002  | - 11.5% | 115.5 ± 55.9       | 115.6 ± 54.4       | 115.3 ± 57.3       | 0.5%   |
| Uric acid (mg/dL)          | 7.7 ± 2.1          | 7.7 ± 2.2          | 7.7 ± 2.1          | 0.3    | 3.8%    | 7.7 ± 2.1          | 7.7 ± 2.1          | 7.6 ± 2.1          | 1.9%   |
| Phosphorous (mg/dL)        | 3.1 ± 0.8          | 3.1 ± 0.8          | 3.1 ± 0.7          | 0.4    | 3.4%    | 3.1 ± 0.8          | 3.1 ± 0.9          | 3.1 ± 0.7          | 3.8%   |
| Calcium (mg/dL)            | 9.6 ± 1.0          | 9.6 ± 1.0          | 9.7 ± 0.9          | 0.2    | -4.8%   | 9.7 ± 1.0          | 9.7 ± 0.9          | 9.7 ± 1.0          | 1.7%   |
| Albumin (g/dL)             | 4.2 ± 0.4          | 4.3 ± 0.4          | 4.2 ± 0.4          | 0.04   | 7.7%    | 4.2 ± 0.4          | 4.2 ± 0.4          | 4.2 ± 0.4          | 2.9%   |
| Bilirubin (mg/dL)          | 0.6 (0.4 – 0.7)    | 0.5 (0.4 – 0.7)    | 0.6 (0.4 – 0.7)    | 0.7    | -1.2%   | 0.6 (0.4 – 0.7)    | 0.6 (0.4 – 0.7)    | 0.6 (0.4 – 0.7)    | - 2.4% |
| Alkaline Phosphatase (U/L) | 71.5 ± 36.4        | 70.9 ± 35.0        | 72.6 ± 38.7        | 0.2    | -4.4%   | 72.0 ± 37.0        | 71.7 ± 34.3        | 72.2 ± 39.5        | - 1.4% |
| Homocysteine (umol/L)      | 16.4 ± 6.4         | 16.4 ± 6.2         | 16.4 ± 6.8         | 0.9    | 0.5%    | 16.4 ± 6.8         | 16.4 ± 6.6         | 16.4 ± 7.0         | 0.3%   |

Std diff, standardized difference; HDL, high density lipoprotein; LDL, low density lipoprotein; eGFR, estimated glomerular filtration rate; ACR, urine albumin to creatinine ratio; ARB, angiotensin receptor blocker; BP, blood pressure; BMI, body mass index
