# Supplementary material
Source: PubMed Central journal article supplement (PMC4969122)
Supplement: NIHMS760232-supplement-4.pdf [file NIHMS760232-supplement-4.pdf]

**Table S3. Association between aspirin use and outcomes in inverse probability weighted models evaluating the average treatment effects for treated participants and in traditional Cox proportional hazards models.**

|                                           |            | IPW Models                   | Traditional Cox Models       |
|-------------------------------------------|------------|------------------------------|------------------------------|
|                                           | N (events) | HR (95% CI), <i>p</i> -value | HR (95% CI), <i>p</i> -value |
| <b>Primary CVD</b>                        | 3122 (313) |                              |                              |
| Unadjusted                                |            | 1.20 (0.93, 1.54), 0.2       | 1.55 (1.24, 1.93), <0.001    |
| Parsimonious Adjusted                     |            | 1.22 (0.94, 1.58), 0.1       | 1.28 (1.01, 1.62), 0.04      |
| Extended Adjusted                         |            | 1.21 (0.94, 1.57), 0.2       | 1.30 (1.02, 1.65), 0.03      |
| <b>All-cause mortality</b>                | 3122 (284) |                              |                              |
| Unadjusted                                |            | 0.89 (0.68, 1.16), 0.4       | 1.11 (0.87, 1.40), 0.4       |
| Parsimonious Adjusted                     |            | 0.90 (0.69, 1.18), 0.5       | 0.97 (0.75, 1.25), 0.8       |
| Extended Adjusted                         |            | 0.90 (0.69, 1.18), 0.5       | 0.98 (0.76, 1.26), 0.9       |
| <b>Kidney failure</b>                     | 3122 (241) |                              |                              |
| Unadjusted                                |            | 0.94 (0.69, 1.27), 0.7       | 0.66 (0.50, 0.87), 0.003     |
| Parsimonious Adjusted                     |            | 1.08 (0.77, 1.50), 0.7       | 0.95 (0.71, 1.28), 0.8       |
| Extended Adjusted                         |            | 1.05 (0.76, 1.46), 0.8       | 0.96 (0.71, 1.28), 0.8       |
| <b>Kidney failure/all-cause mortality</b> | 3122 (485) |                              |                              |
| Unadjusted                                |            | 0.91 (0.73, 1.12), 0.4       | 0.88 (0.73, 1.06), 0.2       |
| Parsimonious Adjusted                     |            | 0.95 (0.76, 1.18), 0.6       | 0.97 (0.79, 1.18), 0.7       |
| Extended Adjusted                         |            | 0.94 (0.76, 1.17), 0.6       | 0.97 (0.80, 1.18), 0.8       |
| <b>Primary CVD/all-cause mortality</b>    | 3122 (466) |                              |                              |
| Unadjusted                                |            | 1.07 (0.87, 1.31), 0.5       | 1.33 (1.10, 1.59), 0.003     |
| Parsimonious Adjusted                     |            | 1.10 (0.89, 1.36), 0.4       | 1.13 (0.93, 1.37), 0.2       |
| Extended Adjusted                         |            | 1.10 (0.89, 1.36), 0.4       | 1.15 (0.94, 1.39), 0.2       |

Parsimonious models were adjusted for age, sex, race, randomization group, country (US vs non-US), graft vintage, graft donor (cadaveric vs living), eGFR, ACR, history of diabetes, systolic and diastolic blood pressure, smoking status, body mass index. The extended adjusted for terms in parsimonious models plus HDL, LDL, triglycerides, use of cyclosporine or tacrolimus, use of sirolimus, use of ACE inhibitor or ARB, use of statin.
